# Supplementary material
Source: PubMed Central journal article supplement (PMC5748910)
Supplement: ASN.2017030285SupplementaryData1.pdf [file ASN.2017030285SupplementaryData1.pdf]

Supplemental information for Martin et al. 2017

“ShcA adaptor protein promotes nephrin endocytosis and is upregulated in proteinuric nephropathies.”

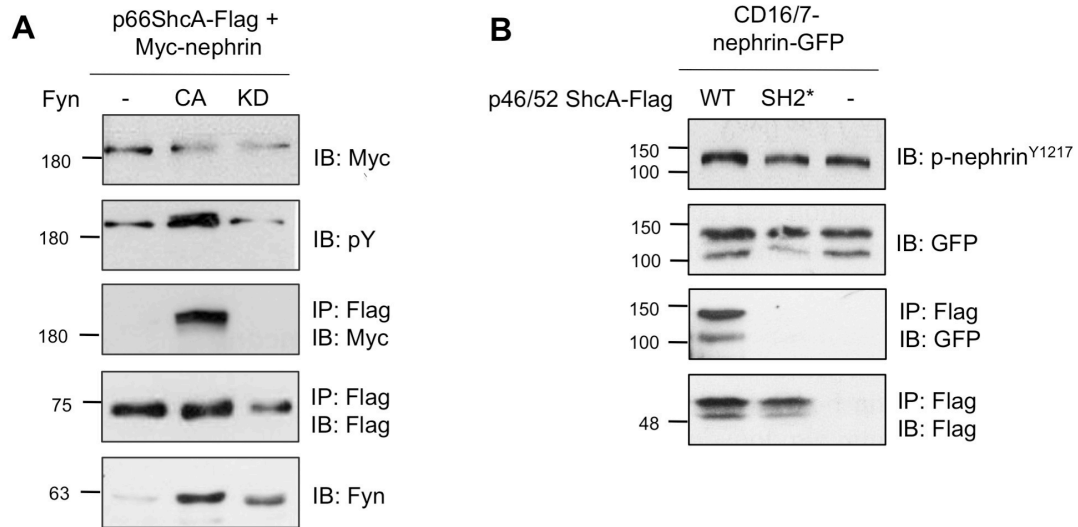

**Supplemental Figure 1. p66 ShcA also binds tyrosine phosphorylated nephrin and p46/52 ShcA recruitment to phosphorylated nephrin is disrupted via mutation to its SH2 domain.** (A) Lysates from HEK293T cells transiently coexpressing p66 ShcA-Flag, Myc-nephrin and constitutively active (CA) or kinase dead (KD)-Fyn were immunoprecipitated (IP) with Flag and immunoblotted (IB) as indicated. p66 ShcA coimmunoprecipitated with phosphorylated nephrin. (B) Lysates from HEK293T cells transiently coexpressing WT p46/52 ShcA-Flag or an SH2\* variant that cannot bind nephrin and CD16/7-nephrin-GFP. Stimulation with CD16 resulted in co-immunoprecipitation of nephrin and WT ShcA, but not the SH2\* mutant.

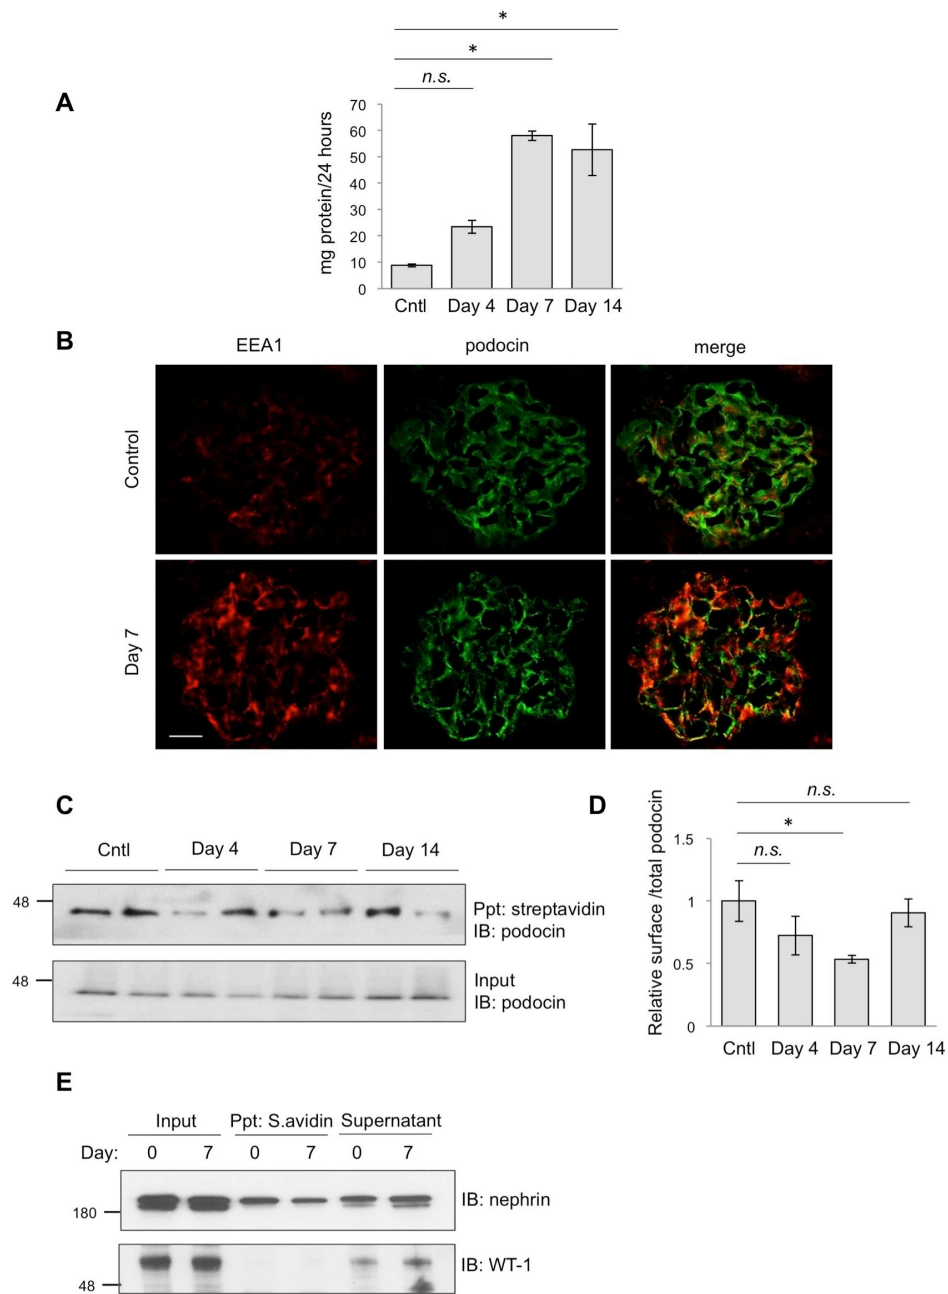

**Supplemental Figure 2. EEA1 and podocin colocalization is enhanced at the peak of PAN nephrosis.** (A) Urinalysis of control (Cntl) and PAN-injected (Day 4, 7, 14) rats showing the characteristic induction of proteinuria. (B) Dual immunofluorescence staining for EEA1 (red) and podocin (green) on kidney sections of control and PAN-injected rats at Day 7 post-injection. Merged images show increased colocalization of EEA1 and podocin at Day 7 compared to control. Scale bar, 20  $\mu$ m. (C) Biotin-labelled and input samples from Figure 5B were immunoblotted (IB) with podocin. (D) Densitometric quantitation showing a transient decrease in surface podocin levels during the injury timecourse. (n=3). \* $P$ <0.05 by two-tailed Student's  $t$ -test. (E) Samples from control and Day 7 of the PAN timecourse were immunoblotted (IB) with nephrin (as in Figure 5B) or WT-1, to verify that a podocyte-specific cytosolic marker is not labeled with biotin.

**Supplemental Table 1:** Dompep prediction of SH2 domain-containing binding partners for nephrin phosphotyrosine residues (human nephrin numbering system).

| Position | SH2 domain | Value |
|----------|------------|-------|
| 977      | FYN        | 0.48  |
|          | SHCA       | -0.41 |
| 1114     | FYN        | 0.64  |
|          | NCK        | 0.04  |
|          | SHCA       | -0.58 |
| 1139     | CRK        | -0.62 |
|          | SHCA       | -0.72 |
|          | CRK        | -0.29 |
|          | SHCA       | -0.72 |
| 1176     | CRK        | -0.29 |
|          | CRKL       | -0.57 |
|          | FYN        | 0.25  |
|          | NCK        | 2.02  |
|          | SHCA       | -0.21 |
| 1193     | CRK        | -0.37 |
|          | FYN        | 0.02  |
|          | NCK        | 2.07  |
|          | SHCA       | -0.02 |
| 1210     | CRK        | 0.23  |
|          | CRKL       | 0.79  |
| 1217     | CRK        | -0.23 |
|          | NCK        | -0.08 |
|          | SHCA       | -0.6  |

**Supplemental Table 2:** Patient information at the time of biopsy.

| Sample    | Age/sex | Urine PCR (g/mmol) except FSGS3 | Serum creatinine ( $\mu\text{mol/L}$ ) | Notes                  |
|-----------|---------|---------------------------------|----------------------------------------|------------------------|
| Control 1 | 59 M    | Negative                        | 110                                    |                        |
| Control 2 | -       | Negative                        | -                                      | Deceased kidney donor  |
| Control 3 | 31 M    | Negative                        | 85                                     |                        |
| FSGS1     | 31 F    | 1.86                            | 84                                     |                        |
| FSGS2     | 24 M    | 2.99                            | 85                                     |                        |
| FSGS3     | 12 M    | >3 g/L                          | 65                                     |                        |
| FSGS4     | 30 F    | 0.32                            | 95                                     |                        |
| MCD1      | 56 M    | 1.33                            | 97                                     |                        |
| MCD2      | 54 M    | 1.07                            | 176                                    | Acute tubular necrosis |
| MCD3      | 31 M    | 0.97                            | 90                                     |                        |
